# Supplementary material for: Do combination HIV prevention programmes result in increased empowerment, inclusion and agency to demand equal rights for marginalised populations in low-income and middle-income countries? A systematic review
Source: PubMed Central journal article supplement — BMJ Glob Health. 2019 Oct 8;4(5):e001560. doi: 10.1136/bmjgh-2019-001560 (PMC6797339; doi:10.1136/bmjgh-2019-001560), 2019-10-08
Supplement: bmjgh-2019-001560supp003.pdf [file bmjgh-2019-001560supp003.pdf]

**Supplementary File 3** Data extraction form

|                                         |  |
|-----------------------------------------|--|
| <b>Timestamp</b>                        |  |
| Study ID (sid):                         |  |
| Coders Initials (coderid):              |  |
| Date Coded (date):                      |  |
| Author(s) (author):                     |  |
| Funder (funder):                        |  |
| Publication date (pubdate):             |  |
| Country (country):                      |  |
| Start date of study (startdate):        |  |
| Start date of study (enddate):          |  |
| Publication Type (pubtype):             |  |
| Name of Program (pname):                |  |
| Location of program (plocale):          |  |
| Region (preion):                        |  |
| Target population (targetpop):          |  |
| Type of key population (kptype):        |  |
| Focus on young population or not (yth): |  |
| Study design (design):                  |  |
| Nature of Comparison Group (compgroup): |  |
| Sample size (sampsize):                 |  |
| Type of sampling (samptype):            |  |
| Outcome Category (out1cat):             |  |
| Outcome1 name (out1name):               |  |
| Type of information (outtype):          |  |
| Source of Information (outsource):      |  |
| Measure/Indicator of Outcome (measure): |  |

|                                                                                                                                                                                                                                      |  |
|--------------------------------------------------------------------------------------------------------------------------------------------------------------------------------------------------------------------------------------|--|
| Were there any differences in measurement of this outcome between the group participants and the comparison?                                                                                                                         |  |
| Direction of Effect (esdir):                                                                                                                                                                                                         |  |
| Effect is statistically significant (essig)?:                                                                                                                                                                                        |  |
| Intermediate outcomes or themes (knowledge, skills):                                                                                                                                                                                 |  |
| Participants views (views):                                                                                                                                                                                                          |  |
| Themes (mtheme):                                                                                                                                                                                                                     |  |
| Subthemes (sttheme):                                                                                                                                                                                                                 |  |
| Outcome2 name (out2name):                                                                                                                                                                                                            |  |
| Outcome3 name (out3name):                                                                                                                                                                                                            |  |
| Outcome4 name (out4name):                                                                                                                                                                                                            |  |
| Other Outcomes                                                                                                                                                                                                                       |  |
| Outcome name (outname):                                                                                                                                                                                                              |  |
| Outcome name (outname):                                                                                                                                                                                                              |  |
| Are empowerment, inclusion or agency included as part of the program or intervention (which includes trying to capture or change experiences of stigma, harmful gender norms, rights around gender based-violence, policy barriers)? |  |
| Are any measures of empowerment, inclusion or agency included in the outcomes (which includes experiences of stigma, harmful gender norms, rights around gender based-violence, policy barriers)?                                    |  |
| Type of Intervention (inttype)                                                                                                                                                                                                       |  |
| Brief Description of the Intervention                                                                                                                                                                                                |  |
| Brief Description of Results                                                                                                                                                                                                         |  |
